# Supplementary material
Source: publisher site journal article supplement (https://www.dovepress.com/article/supplementary_file/540126/540126%20Revised%20%252509Supplementary%20Material.docx)
Supplement: Supplementary file 1 [file 540126%20Revised%20%252509Supplementary%20Material.docx]

**S 1. Experimental section**

**S 1.1** **Material and reagent.**

L929 cells and Dulbecco’s modified eagle medium (DMEM) were purchased from Wuhan Pricella Biotechnology Co., Ltd. (Wuhan, China). Human umbilical vein endothelial cells (HUVEC-SV40) and HUVEC-SV40 specific culture medium were obtained from Wuhan Shangen Biotechnology Co., Ltd. (Wuhan, China). Calcein-AM/PI staining kit was acquired from Yisheng Biotechnology Co., Ltd. (Shanghai, China). 3-(4,5-Dimethyl-2-thiazole)-2,5-diphenyl tetrazolium bromide thiazole blue (MTT) assay kit was procured from Wuhan Saiweier Biotechnology Co., Ltd. (Wuhan, China). Trypsin-EDTA digestion solution (0.25%), PBS buffer (pH 7.2-7.4) and 4% paraformaldehyde fixative were purchased from Solarbio (Beijing, China). Hematoxylin and eosin (H&E) staining kit and Masson staining kit were purchased from Servicebio (Wuhan, China). Primary antibody of TNF-α and IL-10 (Rabbit Anti-Rat), secondary antibody (Goat Anti-rabbit) and 4′,6-diamidino-2-phenylindole (DAPI) were purchased from BIOSS Biotechnology Co., Ltd (Beijing, China).

**S 1.2** **In vitro effects of PPNM-Gel on cell proliferation and viability**

L929 cells were cultured in DMEM medium supplemented with 10% fetal bovine serum (FBS) and 1% penicillin-streptomycin in an incubator (37 °C, 5% CO2). The digestion passaging process was carried out when the cells showed 80% confluence. The replacement time for cell culture medium was 2-3 days.

The impact of PPNM-Gel on the growth and viability of L929 cells was evaluated via the MTT and live/dead cell staining assays. Hydrogel extracts were prepared by soaking the different PPNM-Gel in DMEM at 37 oC for 48 h. For the MTT assay, L929 cells with a density of 5×104 mL-1 were incubated in a 96 well plates with 100 μL per well for 24 h and then incubated with 100 μL of hydrogel extracts for 24 h. Subsequently, culture medium was removed and 20 μL of MTT working solution was added. After incubation for 4 h, the MTT supernatant was discarded and 100 μL of DMSO was added. After further incubation for 15 min, the cell survival rate was evaluated by measuring the absorbance at 570 nm. For the live/dead cell staining assay, L929 cells (5×104 mL-1) were seeded into a 96 well plates with 100 μL per well for 24 h and then treated with 100 μL of different hydrogel extracts for 24 h. The treated cells were stained with calcein-AM (2 μM) and propidium iodide (PI, 4.5 μM) fluorescent dyes for 15 min according to the manufacturer's instructions. The live and dead cells exhibited green fluorescence with calcein AM and red fluorescence with PI, respectively, which were photographed under an inverted fluorescence microscope (Leica DMI3000B, Germany).

**S 1.3** **Scratch assay**

HUVEC-SV40 was seeded on 12 well plates with a density of 5×105 per well, then cultured at 37 oC with 5% CO2 environment. After 24 h, the confluent monolayers were scraped vertically with a 10 μL sterile pipette and gently rinsed 3 times with PBS to remove the suspended cells. The different hydrogel extracts were mixed with the medium, which were added into the cells for the further culture. The cell migration rate was photographed and recorded at 0, 12, 24 and 48 h (repeated 6 times).

**S 1.4** **In vitro biofilm assay**

In brief, 0.5 mL of *S. aureus* or *E. coli* suspension (2×108 CFU mL-1) was taken in a 48-well plate and biofilms were formed after incubation at 37 oC for 48 h. Then, PVA/SA-Gel or different PPNM-Gel (50 mg) soaked in 0.03% H2O2 solution was added and further incubated in a 37 oC incubator with 24 h. Subsequently, the supernatant from each well plate was removed and 0.4 mL of methanol was used to fix the bacteria. After 20 min of fixation, the methanol was removed and 0.2 mL of crystal violet solution (0.1%) was added for staining. After 30 min of staining, the excess dye was washed with pure water. Next, the each well was filled with 0.1 mL of 33% acetic acid solution and incubated at 37 oC for 30 min. Finally, the absorbance of the each well at 590 nm was detected by a microplate reader.

**S 1.5 Histopathology and immunofluorescence Staining**

H&E staining and Masson staining were performed on the paraffin-embedded sections according to the manufacturer's instructions. Immunofluorescence staining of TNF-α and IL-10 was also performed on the paraffin-embedded sections as according to previous report [1]. Fluorescence images were acquired using an inverted fluorescence microscope and analyzed using Image J software.

**S 2. Figures**





Figure S1. The hydrodynamic particle size of MIL-88 and PPNM.





Figure S2. The zeta potential of MIL-88 and PPNM (△ Denotes *P* < 0.05 compared with the MIL-88).





Figure S3. The pore sizes of PVA/SA-Gel, PPNM5-Gel, PPNM10-Gel, PPNM15-Gel and PPNM25-Gel (* Denotes *P* > 0.05 compared with the PVA/SA-Gel; △ Denotes *P* < 0.05 compared with the PVA/SA-Gel).


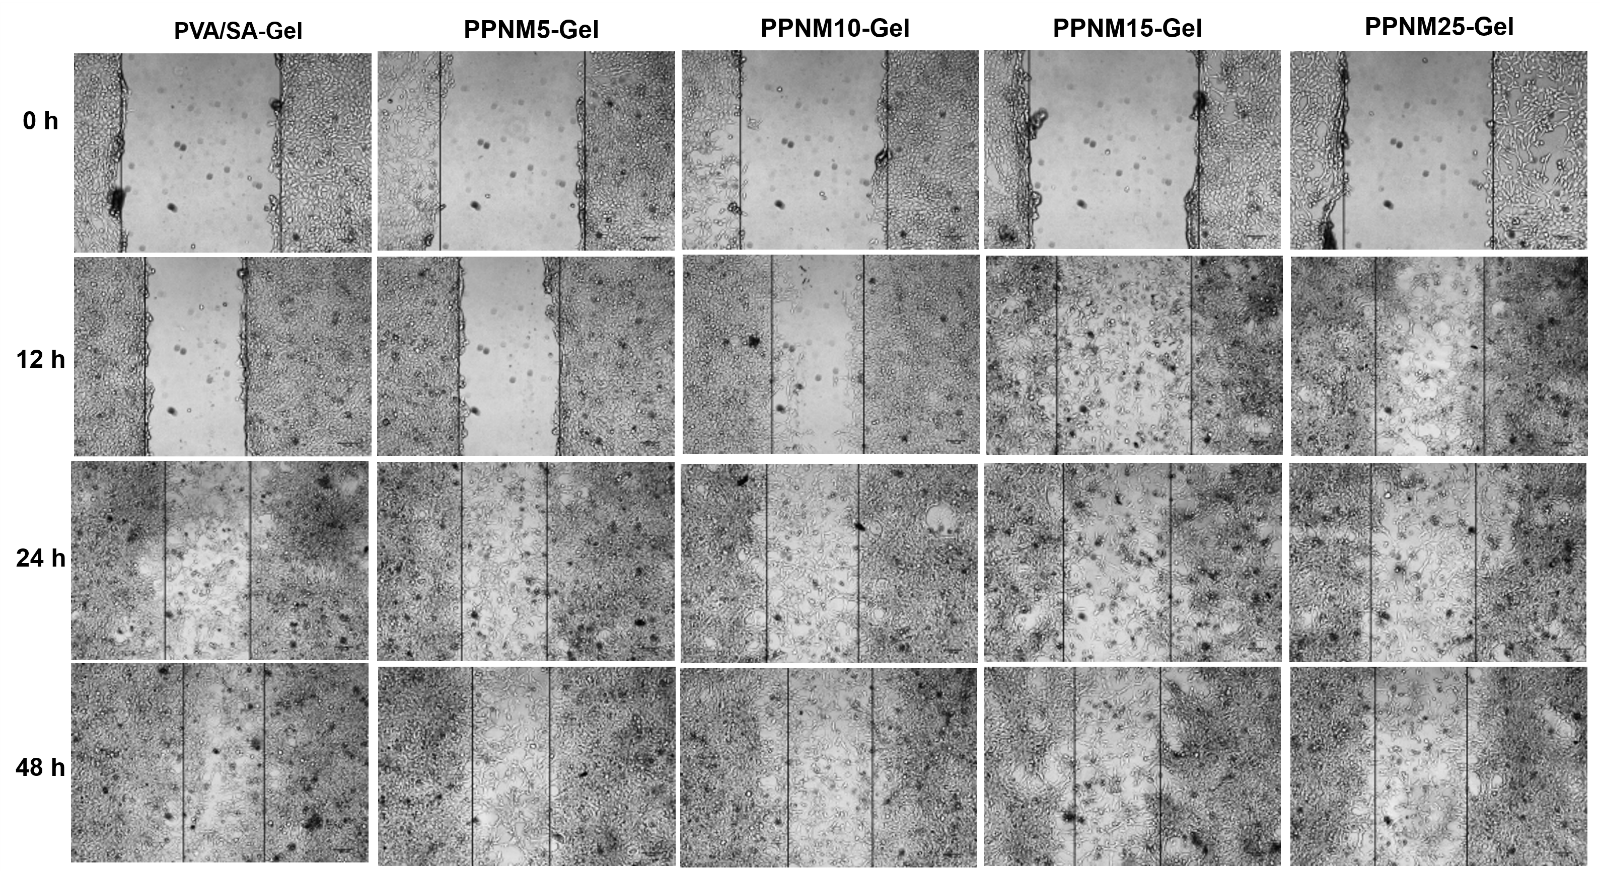


Figure S4. Scratch images of HUVECs after incubation with different hydrogel extracts for 12, 24 and 48 h.


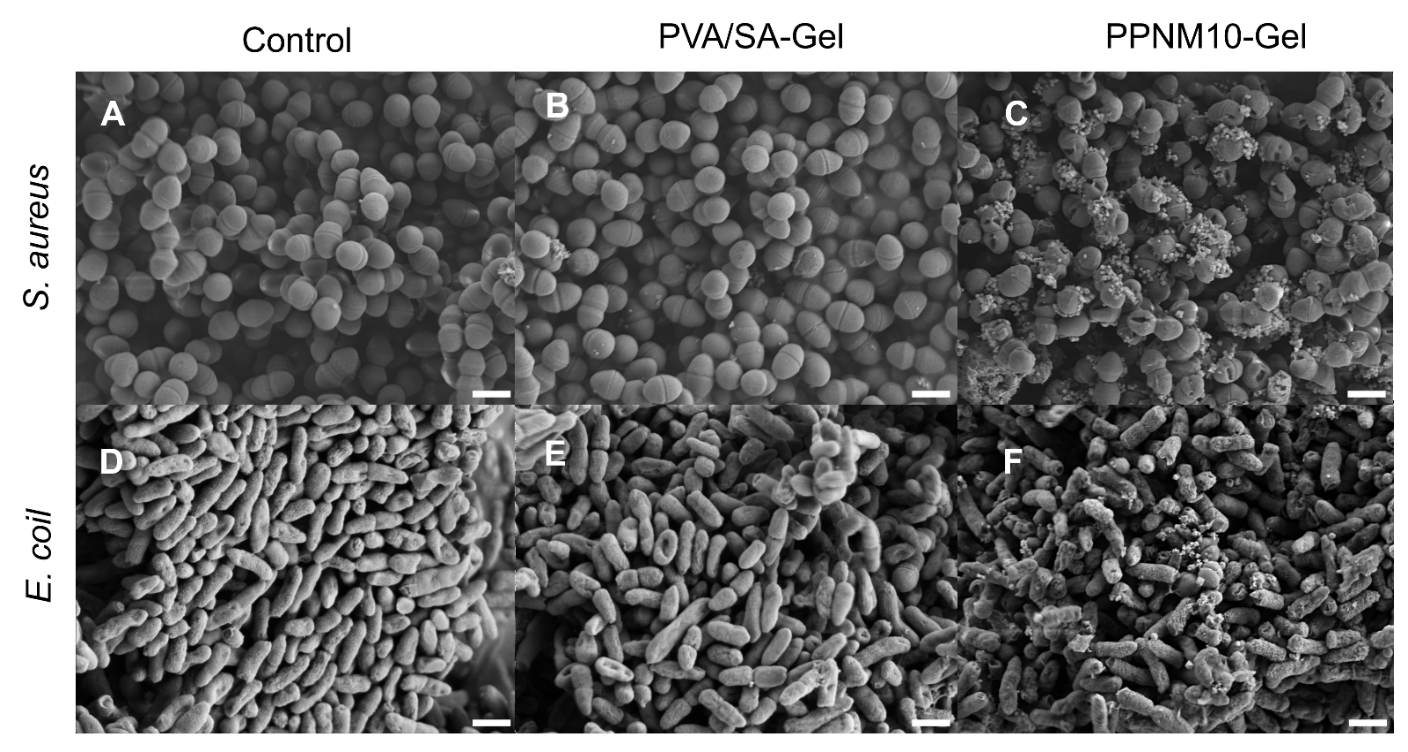


Fig. S5. Representative SEM images of *S. aureus* and *E. coli* with different treatments; bars = 1.0 μm.


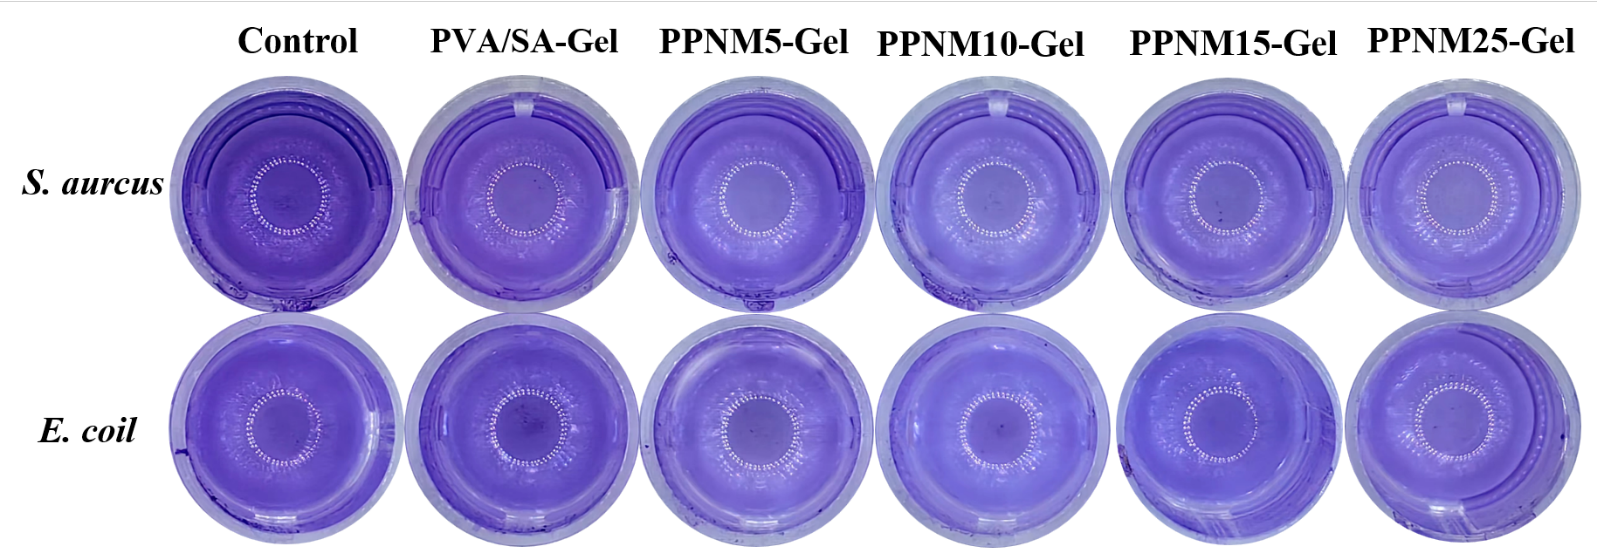


Fig. S6. Crystal violet staining images of *S. aureus* and *E. coli* after 48 h incubation with PVA/SA-Gel and different PPNM-Gel.

**S 3. Tables**

Table S1. The factors and levels of PtPdNi trimetallic-doped MIL-88 (PPNM).

| Level  *i* | Factor | | | |
| --- | --- | --- | --- | --- |
| Pt2+ (mmol) | | Pd2+ (mmol) | Ni2+ (mmol) |
| 1 | 0.01 | 0.01 | | 0.01 |
| 2 | 0.02 | 0.02 | | 0.02 |
| 3 | 0.03 | 0.03 | | 0.03 |

Table S2. Comparison of the oxidase-like kinetic parameters of PPNM and some previously reported nanozymes.

| Nanozyme | *Km* (mM) | *Vmax* (μM S-1) | Ref. |
| --- | --- | --- | --- |
| PPNM | 0.066 | 0.094 | This work |
| Chitosan-stabilized PtAu nanoparticles | 0.5391 | 0.6188 | 2 |
| Vancomycin-stabilized platinum nanoparticles | 1.256 | 0.66138 | 3 |
| Fe-N-coordinated centers supported by carbonaceous substrates as promising artificial metalloenzymes (AMEs) (Fe-AME) | 1.07 | 0.927 | 4 |
| Mn3O4 nanoflowers | 13.2 | 0.0135 | 5 |
| Oxygen vacancie-Mn3O4 nanoflowers | 1.66 | 0.0397 | 5 |
| Cobalt-graphene loaded with histidine-functionalized graphene quantum dot (Co-His-GQD-G) | 0.66 | 0.38 | 6 |

Table S3. Comparison of the peroxidase-like kinetic parameters of PPNM and some previously reported nanozymes.

| Nanozyme | *Km* (mM) | | *Vmax* (μM S-1) | | Ref. |
| --- | --- | --- | --- | --- | --- |
| H2O2 | TMB | H2O2 | TMB |
| PPNM | 6.650 | 0.327 | 0.161 | 0.196 | This work |
| Chitosan-stabilized PtAu nanoparticles | 0.6984 | 0.2763 | 0.3256 | 0.3256 | 2 |
| Bimetallic PdRu nanozyme | 1.628 | 0.745 | 0.2739 | 0.3166 | 7 |
| AgPt@Fe3O4 | 3.463 | 0.442 | 0.02076 | 0.04763 | 8 |
| Pd@Pt NPs | 0.2 | 0.5 | 0.013 | 0.015 | 9 |
| Fe3O4@MOF@Au nanoparticles | 0.24 | 0.34 | 0.101 | 0.235 | 10 |
| Sulfur doped graphdiyne | 47.6 | 1.27 | 0.0592 | 0.173 | 11 |
| Ultrathin NiCoCu MOF nanosheets | 1.08 | 0.334 | NM a | NM a | 12 |

a NM: not mentioned.

**Reference**

[1] Ou XL, Guan L, Guo WL, et al. Graphene oxide-based injectable conductive hydrogel dressing with immunomodulatory for chronic infected diabetic wounds. Mater. Des. 2022, 224, 111284.

[2] Y. Wen, W. Chen, R. Wu, J. Guo, X. Liu, B. Shi, C. Zhang, L. Wu, Y. Zheng, A. Liu, L. Lin, Chitosan-stabilized PtAu nanoparticles with multienzyme-like activity for mixed bacteria infection wound healing and insights into its antibacterial mechanism, Small Struct. 5(6) (2024) 2300553.

[3] Y. Xue, K. Liu, M. Gao, T. Zhang, L. Wang, Y. Cui, X. Ji, G. Ma, J. Hu, Vancomycin-stabilized platinum nanoparticles with oxidase-like activity for sensitive dopamine detection, Biomolecules 13(9) (2023) 1312.

[4] S. Cao, Z. Zhao, Y. Zheng, Z. Wu, T. Ma, B. Zhu, C. Yang, X. Xiang, L. Ma, X. Han, Y. Wang, Q. Guo, L. Qiu, C. Cheng, A library of ROS-catalytic metalloenzyme mimics with atomic metal centers, Adv. Mater. 34(16) (2022) 2200255.

[5] W. Lu, J. Chen, L. Kong, F. Zhu, Z. Feng, J. Zhan, Oxygen vacancies modulation Mn3O4 nanozyme with enhanced oxidase-mimicking performance for L-cysteine detection, Sens. Actuator B Chem. 333 (2021) 129560.

[6] L. Nana, L. Ruiyi, W. Qinsheng, Y. Yongqiang, S. Xiulan, W. Guangli, L. Zaijun, Colorimetric detection of chlorpyrifos in peach based on cobalt-graphene nanohybrid with excellent oxidase-like activity and reusability, J. Hazard. Mater. 415 (2021) 125752.

[7] Y. Wang, T. Bu, Y. Cao, H. Wu, J. Xi, Q. Feng, C. Xuan, L. Wang, A versatile PdRu bimetallic nanoenzyme-integrated enzyme-linked immunosorbent assay for highly sensitive *Escherichia coli* O157:H7 detection, Anal. Chem. 95(24) (2023) 9237-9243.

[8] W. Duan, J. Wang, X. Peng, S. Cao, J. Shang, Z. Qiu, X. Lu, J. Zeng, Rational design of trimetallic AgPt–Fe3O4 nanozyme for catalyst poisoning-mediated CO colorimetric detection, Biosens. Bioelectron. 223 (2023) 115022.

[9] S.C. Wu, T.T. Tsai, T.H. Li, C.Y. Tung, P.Y. Chiu, J.H. Lin, C.F. Chen, Palladium-platinum bimetallic nanomaterials and their application in *Staphylococcus aureus* detection on paper-based devices, Biosens. Bioelectron. 216 (2022) 114669.

[10] C. Liu, X. Zhao, Z. Wang, Y. Zhao, R. Li, X. Chen, H. Chen, M. Wan, X. Wang, Metal-organic framework-modulated Fe3O4 composite au nanoparticles for antibacterial wound healing via synergistic peroxidase-like nanozymatic catalysis, J. Nanobiotechnol 21(1) (2023) 427.

[11] J. Zhang, Q. Bai, X. Bi, C. Zhang, M. Shi, W.W. Yu, F. Du, L. Wang, Z. Wang, Z. Zhu, N. Sui, Piezoelectric enhanced peroxidase-like activity of metal-free sulfur doped graphdiyne nanosheets for efficient water pollutant degradation and bacterial disinfection, Nano Today 43 (2022) 101429.

[12] Lin, C.; Guo, X.; Chen, L.; You, T.; Lu, J.; Sun, D., Ultrathin trimetallic metal-organic framework nanosheets for accelerating bacteria-infected wound healing. J. Colloid Interf. Sci. 2022, 628, 731-744.
